# Supplementary material for: Xue-fu-Zhu-Yu decoction protects rats against retinal ischemia by downregulation of HIF-1α and VEGF via inhibition of RBP2 and PKM2
Source: Springer Nature journal article supplement (doi:10.1186/s12906-017-1857-2), 2017-07-14
Supplement: MOESM1 [file 13304248]

| Gr/M | Nor  | Sham   | Veh + I/R | I/R + Veh | XF <sub>1.35</sub> + I/R | XF <sub>2.7</sub> + I/R | I/R + XF <sub>1.35</sub> | I/R + XF <sub>2.7</sub> | Total*   |
|------|------|--------|-----------|-----------|--------------------------|-------------------------|--------------------------|-------------------------|----------|
| ERG  | (5)† | (9)†   | (6)†      | 5         | (4)†                     | (8)†                    | 6                        | (6)†                    | 11       |
| PHX  | -    | 4      | 4         | -         | 4                        | 4                       | -                        | 4                       | 20       |
| FG   | 4    | 4(3)†† | 4         | -         | 4                        | 4                       | -                        | 4                       | 24(23)†† |
| PCR  | 4    | 4      | 4         | -         | 4                        | 4                       | -                        | 4                       | 24       |
| WB   | 4    | 4      | 4         | -         | 4                        | 4                       | -                        | 4                       | 24       |
| Ab   | =    | =      | =         | -         | I/R + Avastin (n=4)      | I/R + Shikonin (n=4)    | I/R + JIB-04 (n=4)§      |                         | 12       |

\*The number of the rats used in this XFZUD (Xue-Fu-Zhu-Yu Decoction) study is **120** (=11+20+24+24+24+12+5), including **5** animals that died during the induction of pressure-induced retinal ischemia.

†After ERG recordings, among all groups except the number of the rats (5+6=11) in I/R + Veh (n=5) and I/R + XF<sub>1.35</sub> groups (n=6), the other rats were preserved for the following procedures, namely PHX, FG, rtPCR and WB.

††One animal died during the FG procedure.

§RBP2 western blot was ill-defined in one rat [I/R + JIB-04 (n=4-1=3)].

Abbreviations: Gr, group; M, methods;; Nor, normal; I/R, ischemia/reperfusion; Veh, vehicle; XF<sub>1.35</sub>, XFZUD 1.35 mg/Kg; XF<sub>2.7</sub>, XFZUD 2.7 mg/Kg; ERG, electroretinogram; PHX, pathohistology (e.g. CV, ChAT & vimentin/GFAP labelling); FG, flurogold; CV, cresyl violet; ChAT, choline acetyl transferase; GFAP, glial fibrillary acidic protein; rtPCR, real-time polymerase chain reaction; WB, western blot; Ab, antibody.
